# Supplementary material for: Alpha-glucosidase inhibitory compounds from Vietnamese lichen Usnea baileyi: in vitro and in silico aspects
Source: Royal Society of Chemistry journal article supplement (doi:10.1039/d4ra04449e), 2024-01-01
Supplement: d4ra04449e1.pdf [file d4ra04449e1.pdf]

## SUPPORTING INFORMATION

### **Alpha-Glucosidase Inhibitory Compounds from Vietnamese Lichen *Usnea baileyi*: *in vitro* and *in silico* aspects**

#### **TABLE OF CONTENTS**

**Figure S1.** Transformation **1** to **1e**

**Figure S2-A.** HRESIMS spectrum of **1a**

**Figure S2-B.**  $^1\text{H}$  NMR (acetone- $d_6$ , 500 MHz) spectrum of **1a**

**Figure S2-C.**  $^{13}\text{C}$ -NMR (acetone- $d_6$ , 125 MHz) spectrum of **1a**

**Figure S2-D.** HMBC (acetone- $d_6$ ) spectrum of **1a**

**Figure S3-A.** HRESIMS spectrum of **1b**

**Figure S3-B.**  $^1\text{H}$ -NMR (acetone- $d_6$ , 500 MHz) spectrum of **1b**

**Figure S3-C.**  $^{13}\text{C}$ -NMR (acetone- $d_6$ , 125 MHz) spectrum of **1b**

**Figure S3-D.** HSQC (acetone- $d_6$ ) spectrum of **1b**

**Figure S4-A.** HRESIMS spectrum of **1c**

**Figure S4-B.**  $^1\text{H}$ -NMR (acetone- $d_6$ , 500 MHz) spectrum of **1c**

**Figure S4-C.** JMOD (acetone- $d_6$ , 125 MHz) spectrum of **1c**

**Figure S5-A.** HRESIMS spectrum of **1d**

**Figure S5-B.**  $^1\text{H}$ -NMR (acetone- $d_6$ , 500 MHz) spectrum of **1d**

**Figure S5-C.** JMOD and  $^{13}\text{C}$  spectra (acetone- $d_6$ , 125 MHz) of **1d**

**Figure S6-A.** HRESIMS spectrum of **1e**

**Figure S6-B.**  $^1\text{H}$  NMR (DMSO- $d_6$ , 500 MHz) spectrum of **1e**

**Figure S6-C.**  $^{13}\text{C}$  NMR (DMSO- $d_6$ , 125 MHz) spectrum of **1e**

**Figure S6-D.** HSQC (DMSO- $d_6$ ) spectrum of **1e**

**Figure S6-E.** HMBC (DMSO- $d_6$ ) spectrum of **1e**

**Figure S7-A.** HRESIMS spectrum of **6a**

**Figure S7-B.**  $^1\text{H}$  NMR (acetone- $d_6$ , 500 MHz) spectrum of **6a**

**Figure S7-C.** JMOD (acetone- $d_6$ , 125 MHz) spectrum of **6a**

**Figure S8.** Transformation **1** to **1e**

**Table S1.** Alpha-glucosidase inhibitory activity of the crude extracts and the fractions prepared from crude EtOAc extract.

**Table S2.** Cytotoxicity of compounds **1-6**, **11**, **1a-1e**, and **6a**

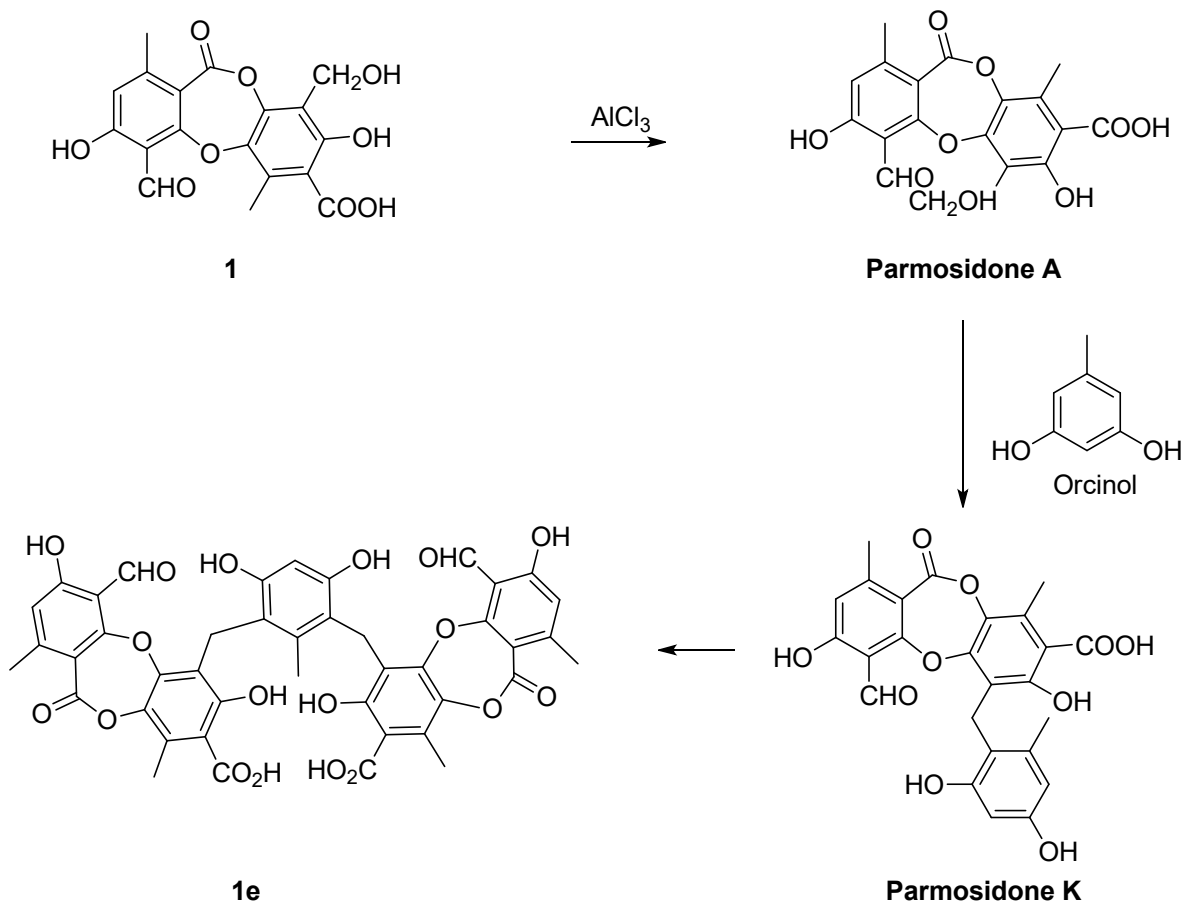

**Figure S1.** Transformation **1** to **1e**

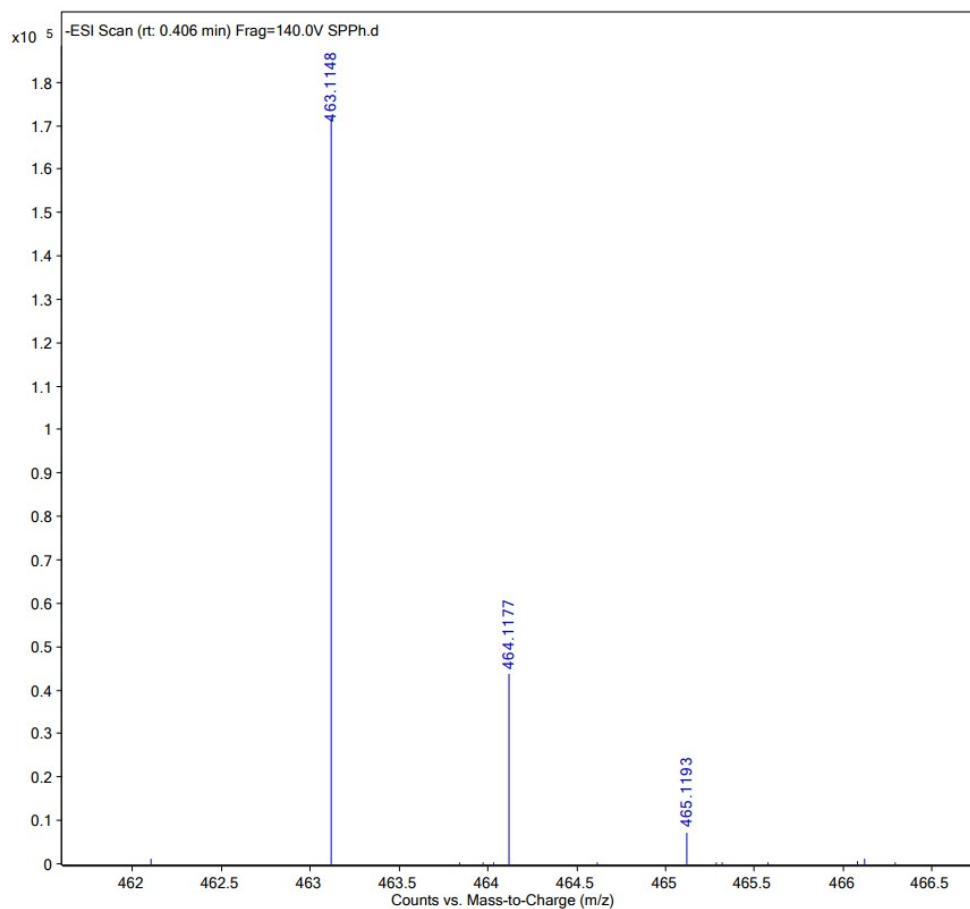

Figure S2-A. HRESIMS spectrum of **1a**

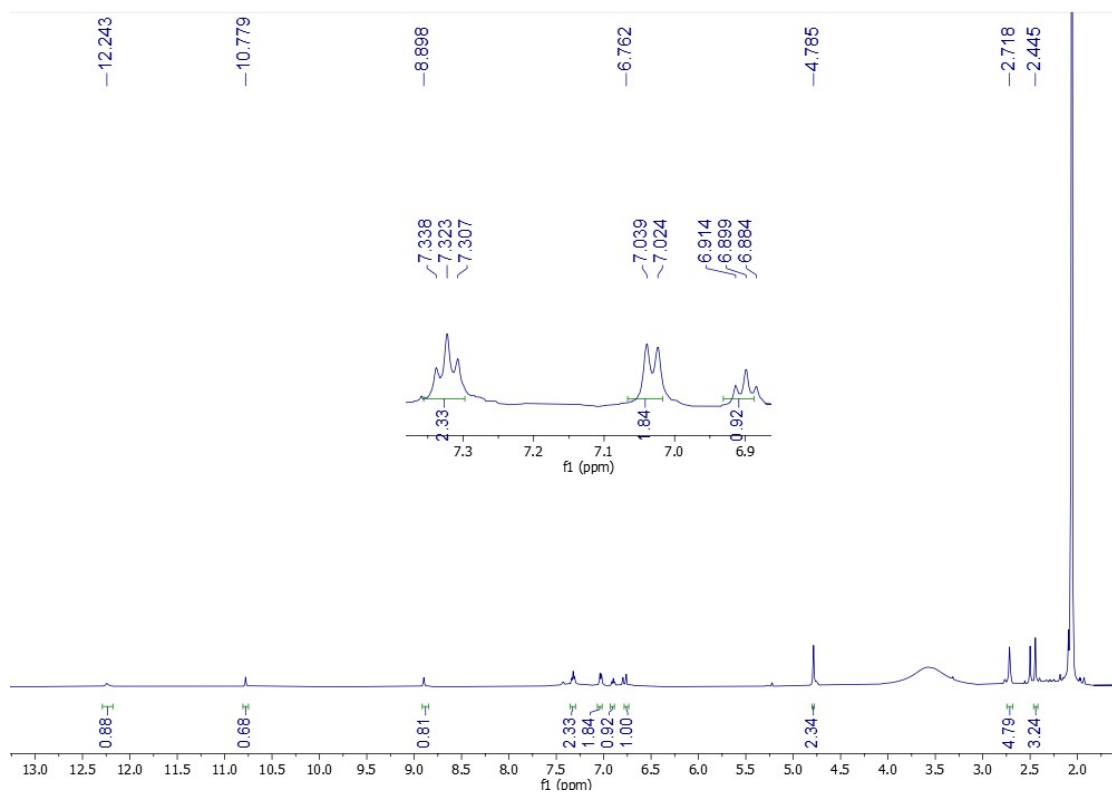

Figure S2-B.  $^1\text{H-NMR}$  (acetone- $d_6$ , 500 MHz) spectrum of **1a**

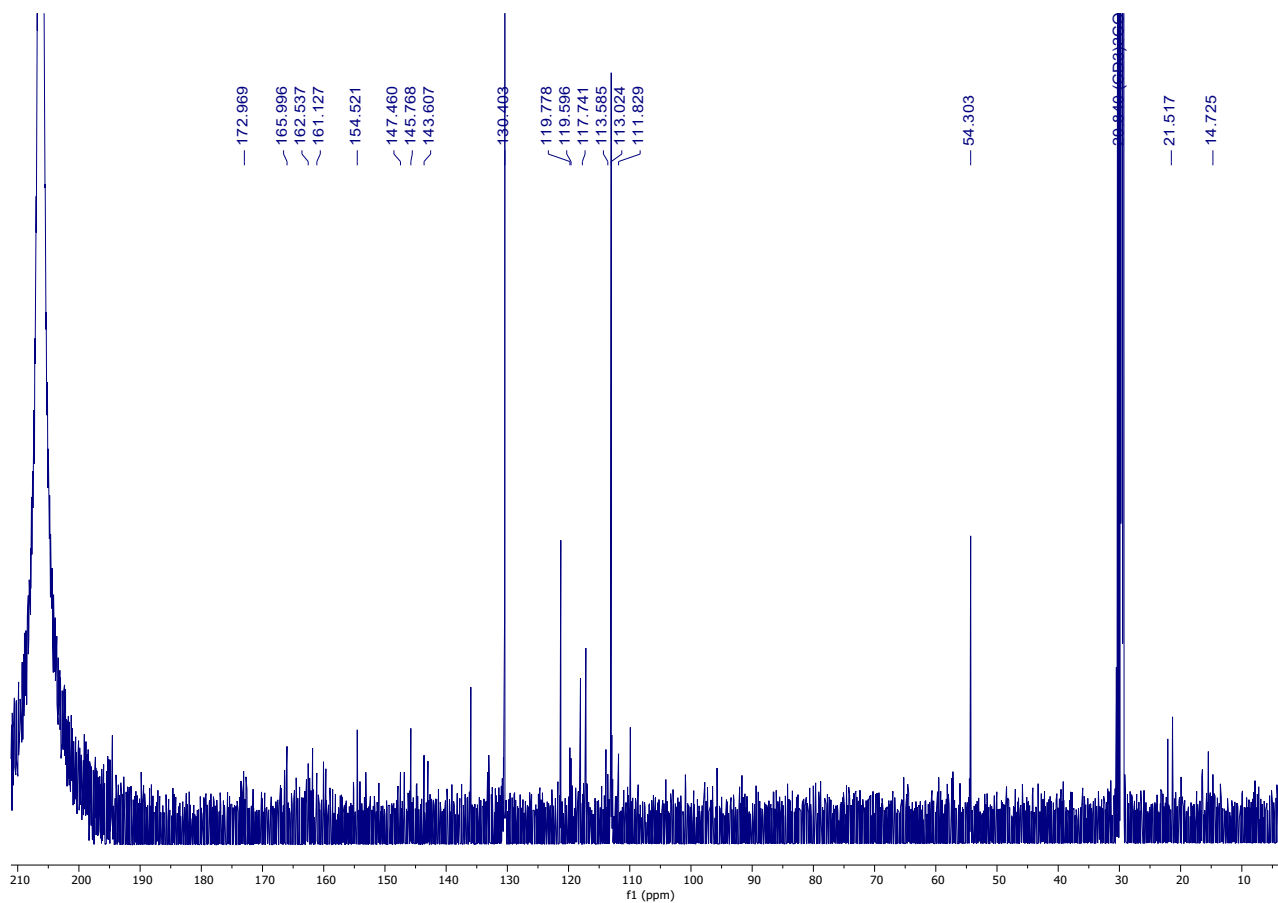

Figure S2-C.  $^{13}\text{C}$ -NMR (acetone- $d_6$ , 125 MHz) spectrum of **1a**

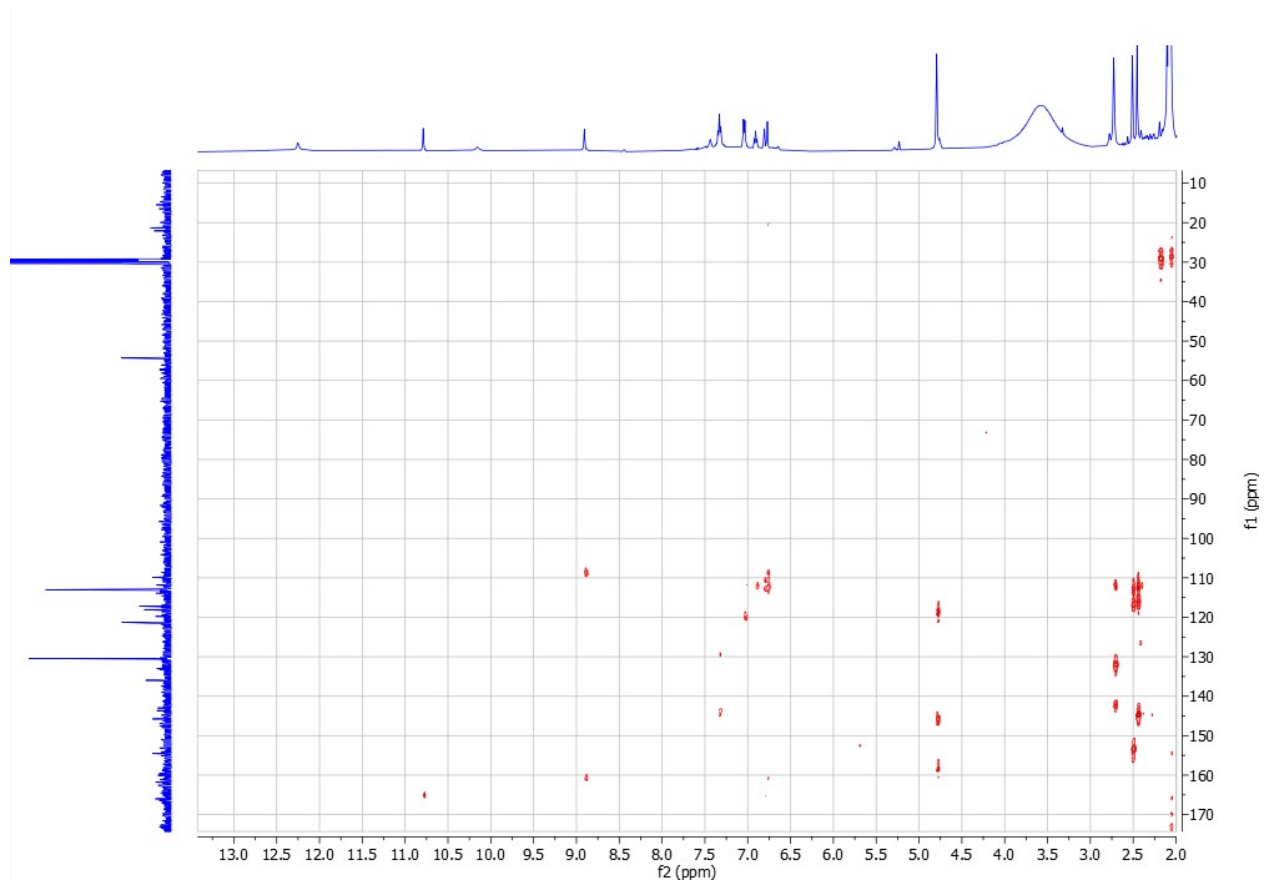

**Figure S2-D.** HMBC (acetone- $d_6$ ) spectrum of **1a**

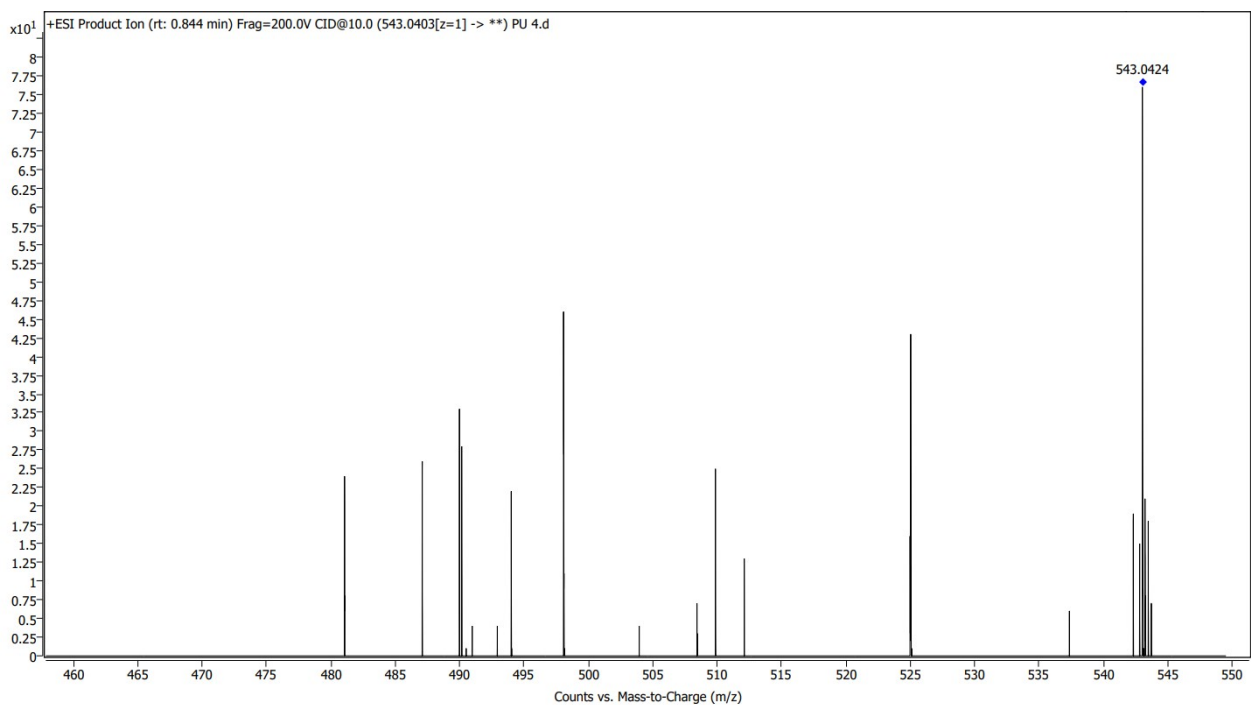

Figure S3-A. HRESIMS spectrum of 1b

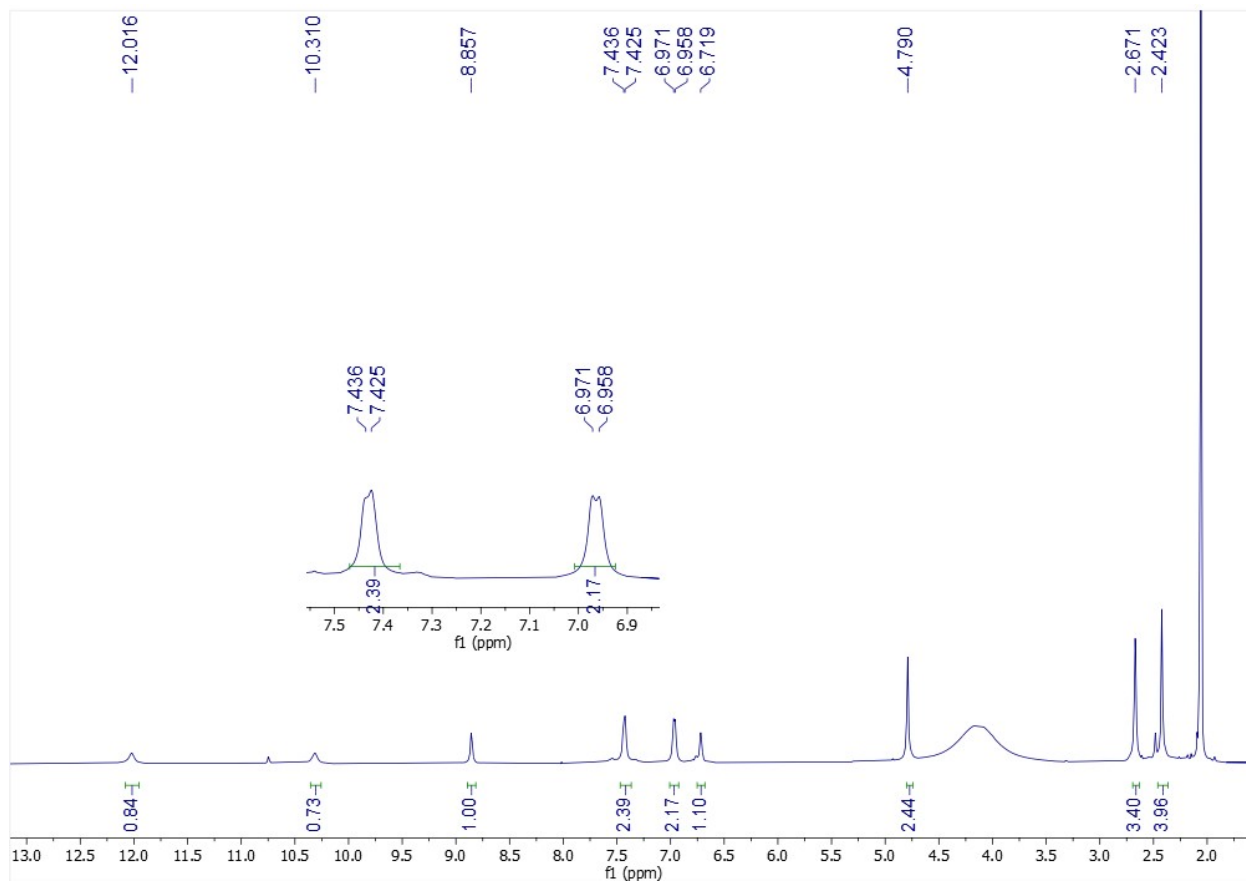

Figure S3-B. <sup>1</sup>H-NMR (acetone-*d*<sub>6</sub>, 500 MHz) spectrum of 1b

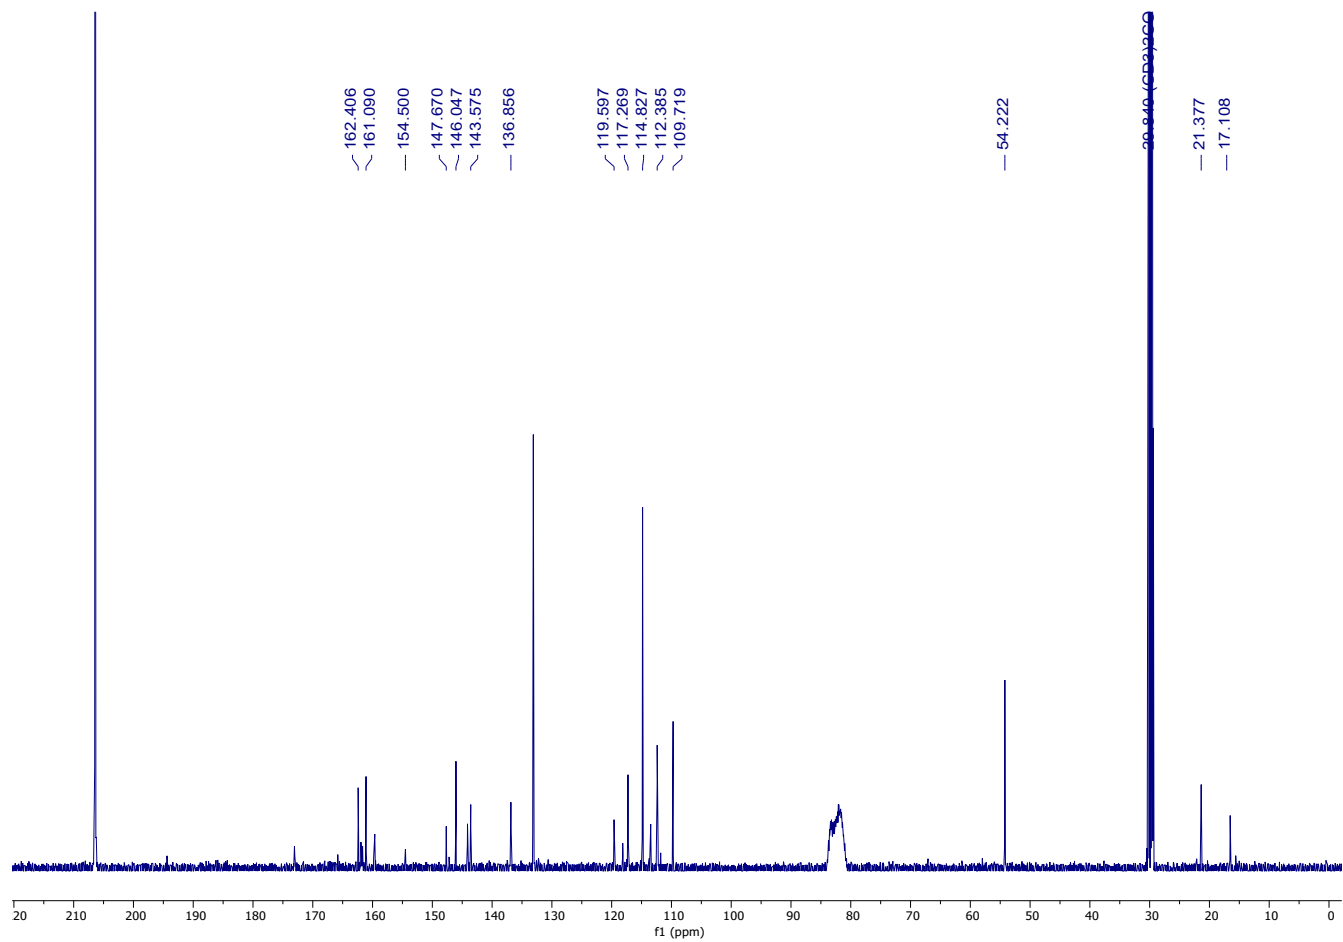

Figure S3-C.  $^{13}\text{C}$ -NMR (acetone- $d_6$ , 125 MHz) spectrum of **1b**

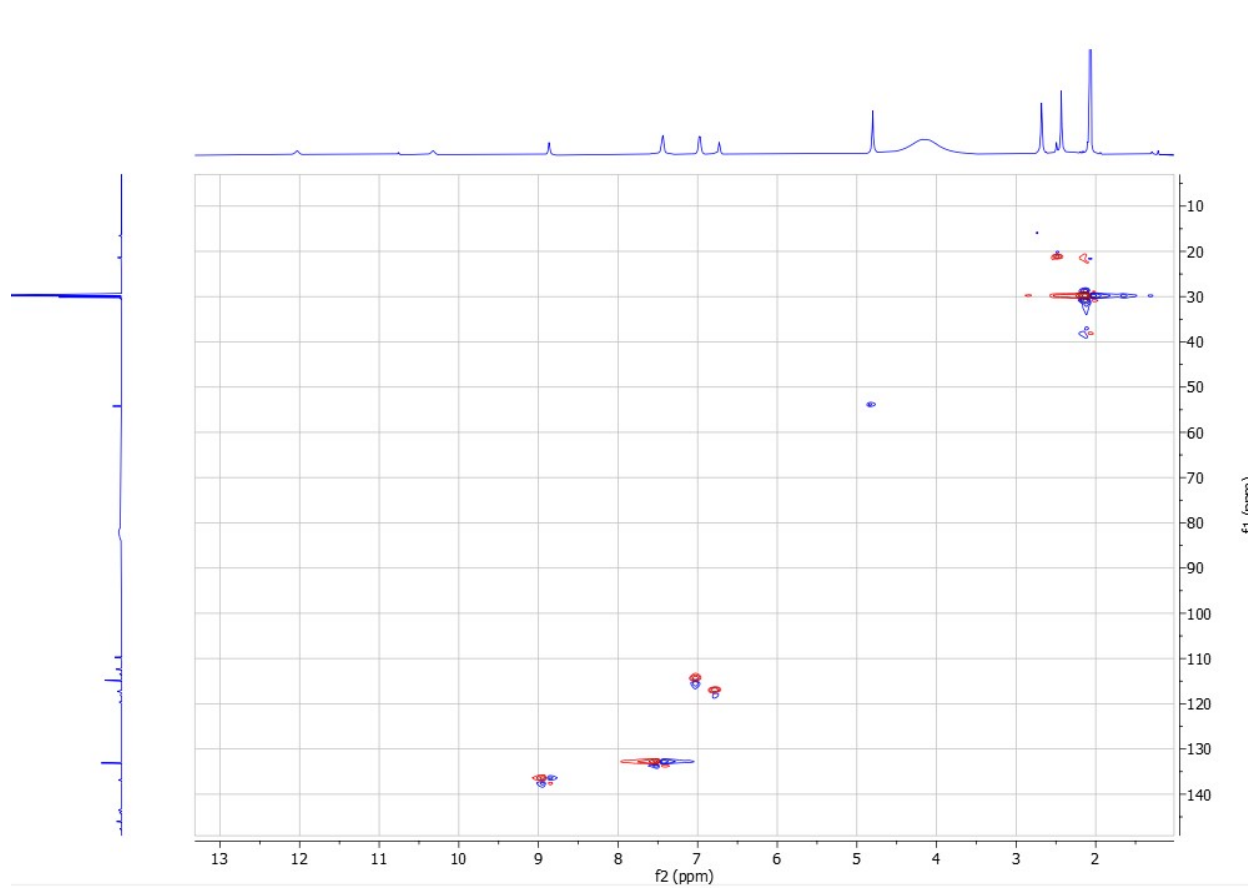

**Figure S3-D.** HSQC (acetone- $d_6$ ) spectrum of **1b**



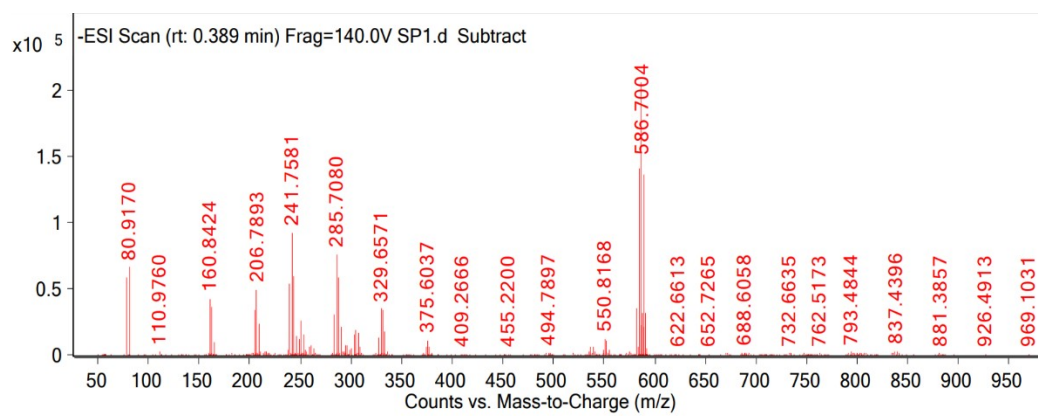

**Figure S4-A.** HRESIMS spectrum of **1c**

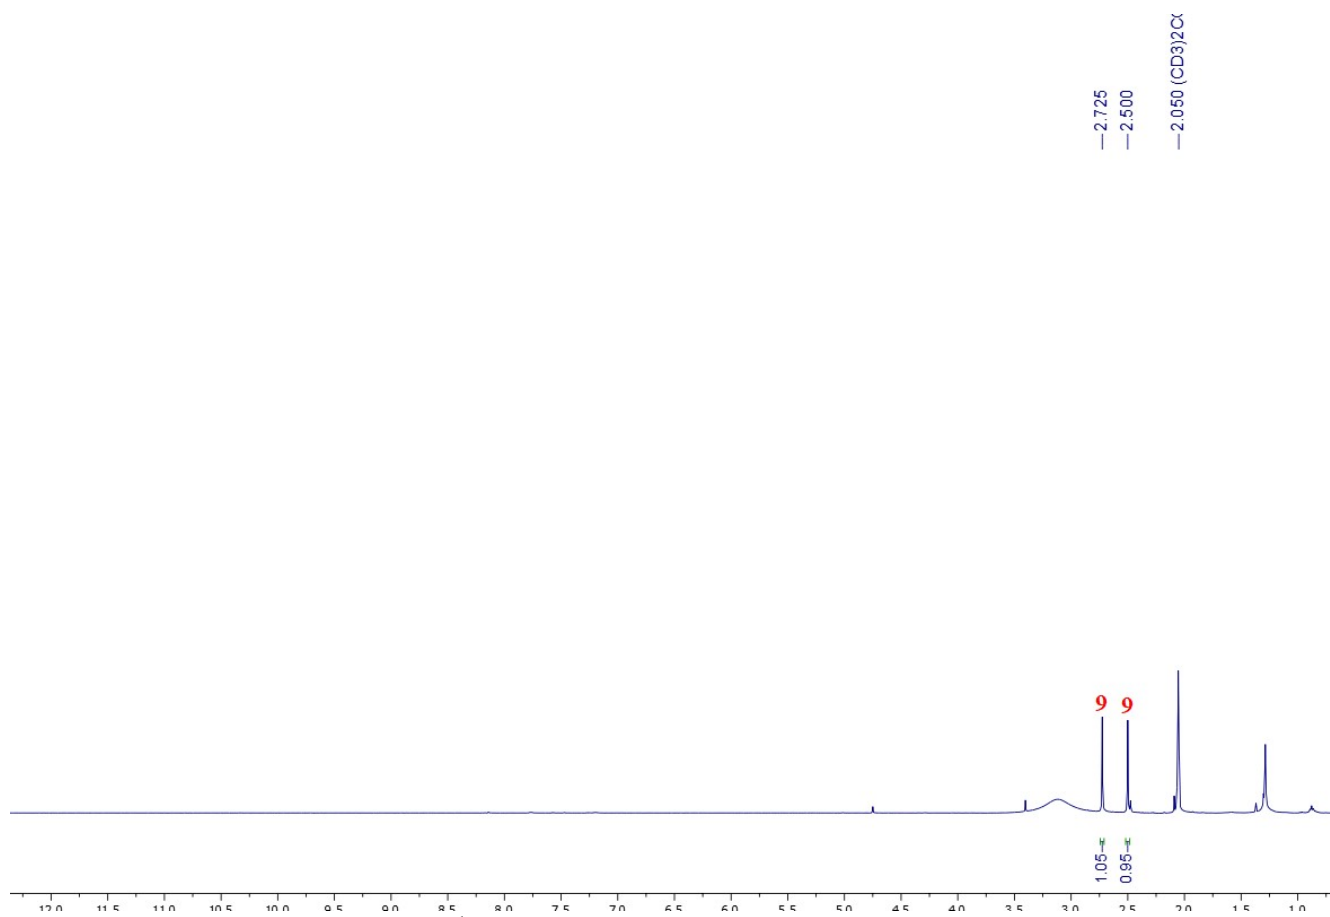

**Figure S4-B.** <sup>1</sup>H-NMR (acetone-*d*<sub>6</sub>, 500 MHz) spectrum of **1c**

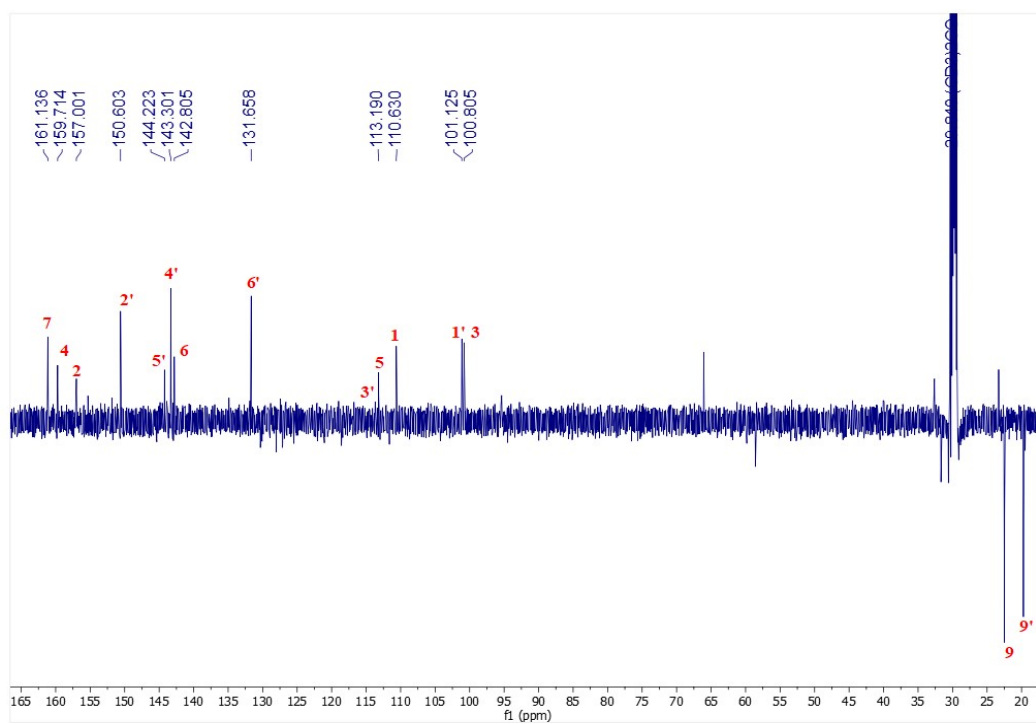

Figure S4-C. JMOD (acetone- $d_6$ , 125 MHz) spectrum of **1c**

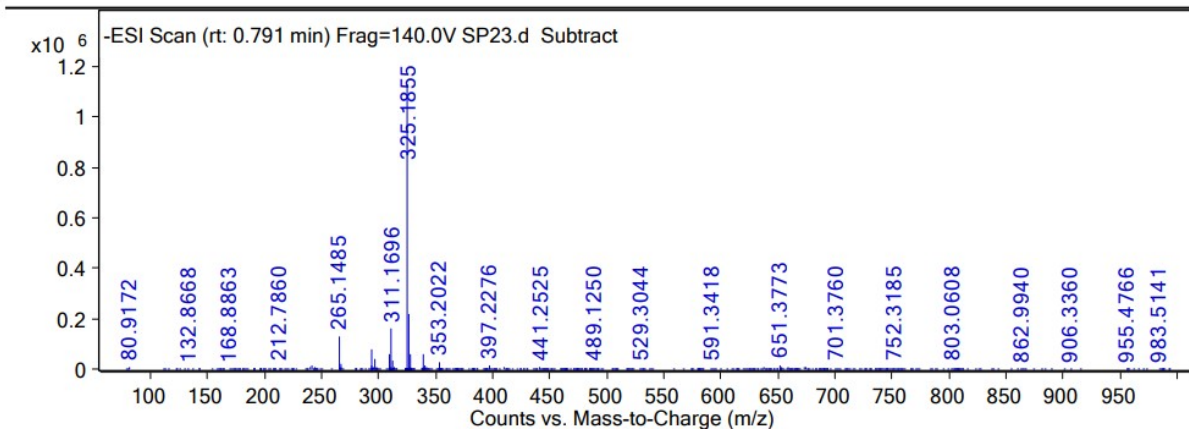

|          |   |          |
|----------|---|----------|
| 573.2203 | 2 | 244.77   |
| 573.9122 |   | 203.06   |
| 574.7172 | 1 | 1782.84  |
| 574.9332 |   | 386.34   |
| 574.9924 |   | 412.2    |
| 575.0315 |   | 224.32   |
| 575.7163 | 1 | 237.88   |
| 575.7721 | 1 | 207.83   |
| 576.7159 | 1 | 2087.6   |
| 576.8142 | 1 | 20902.08 |
| 576.9439 |   | 352.38   |
| 577.0114 |   | 286.19   |
| 577.0541 |   | 386.07   |
| 577.2051 |   | 211.16   |
| 577.3543 |   | 340.89   |
| 577.4006 |   | 334.22   |

### Qualitative Analysis Report

|          |   |          |
|----------|---|----------|
| 577.6627 |   | 241.2    |
| 577.7104 | 1 | 503.45   |
| 577.8174 | 1 | 4372.84  |
| 578.0976 |   | 263.15   |
| 578.714  | 1 | 1586.43  |
| 578.8127 | 1 | 62467.27 |
| 579.3608 |   | 412.12   |
| 579.4896 |   | 219.86   |
| 579.6746 |   | 280.21   |
| 579.7105 | 1 | 291.28   |
| 579.8162 | 1 | 11807.33 |
| 579.9693 |   | 272.47   |
| 580.7102 | 1 | 544.9    |
| 580.811  | 1 | 64009.91 |
| 581.2263 |   | 257.39   |

Figure S5-A. HRESIMS spectrum of 1d

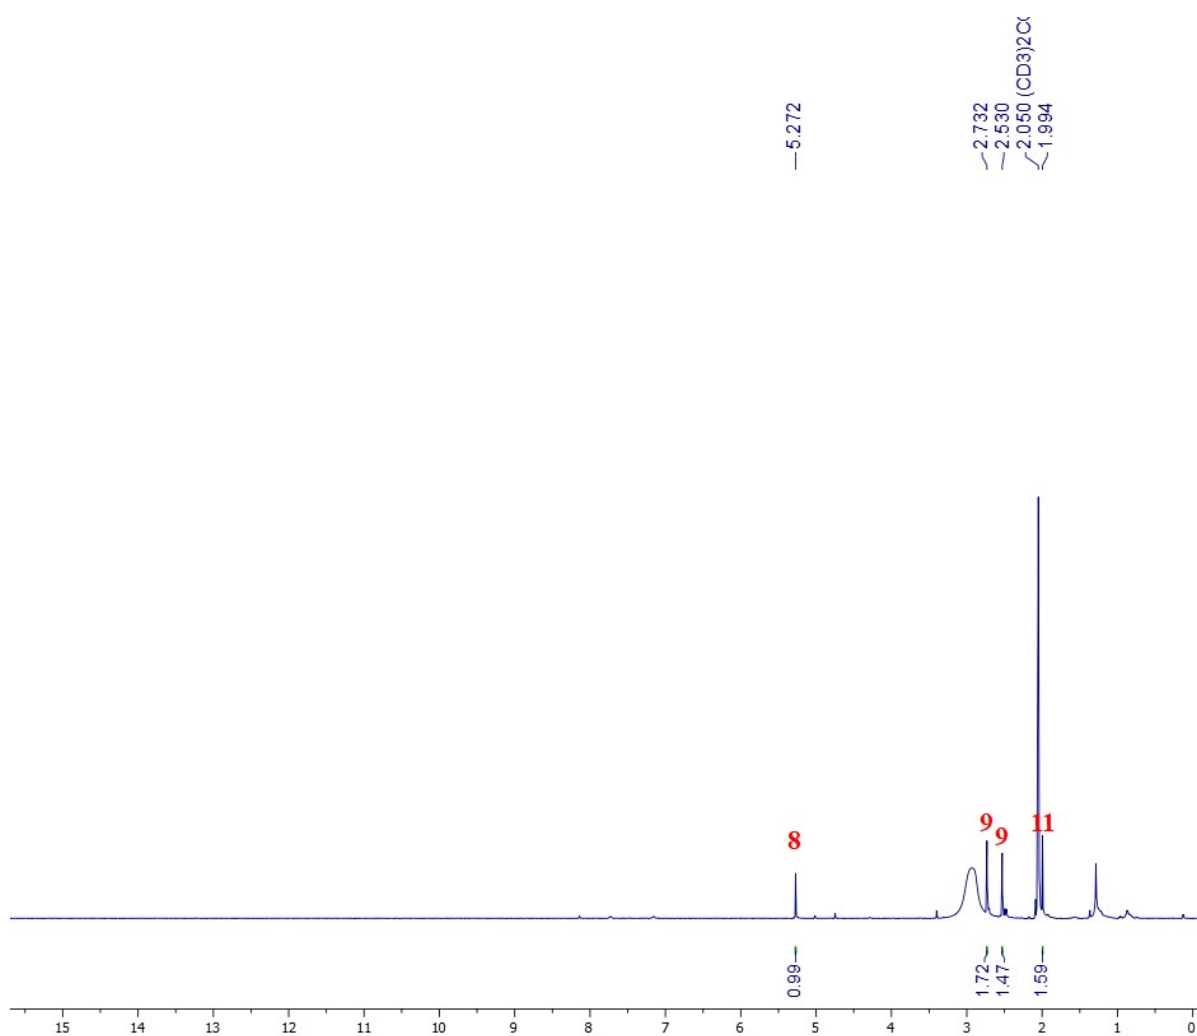

**Figure S5-B.**  $^1\text{H-NMR}$  (acetone- $d_6$ , 500 MHz) spectrum of **1d**

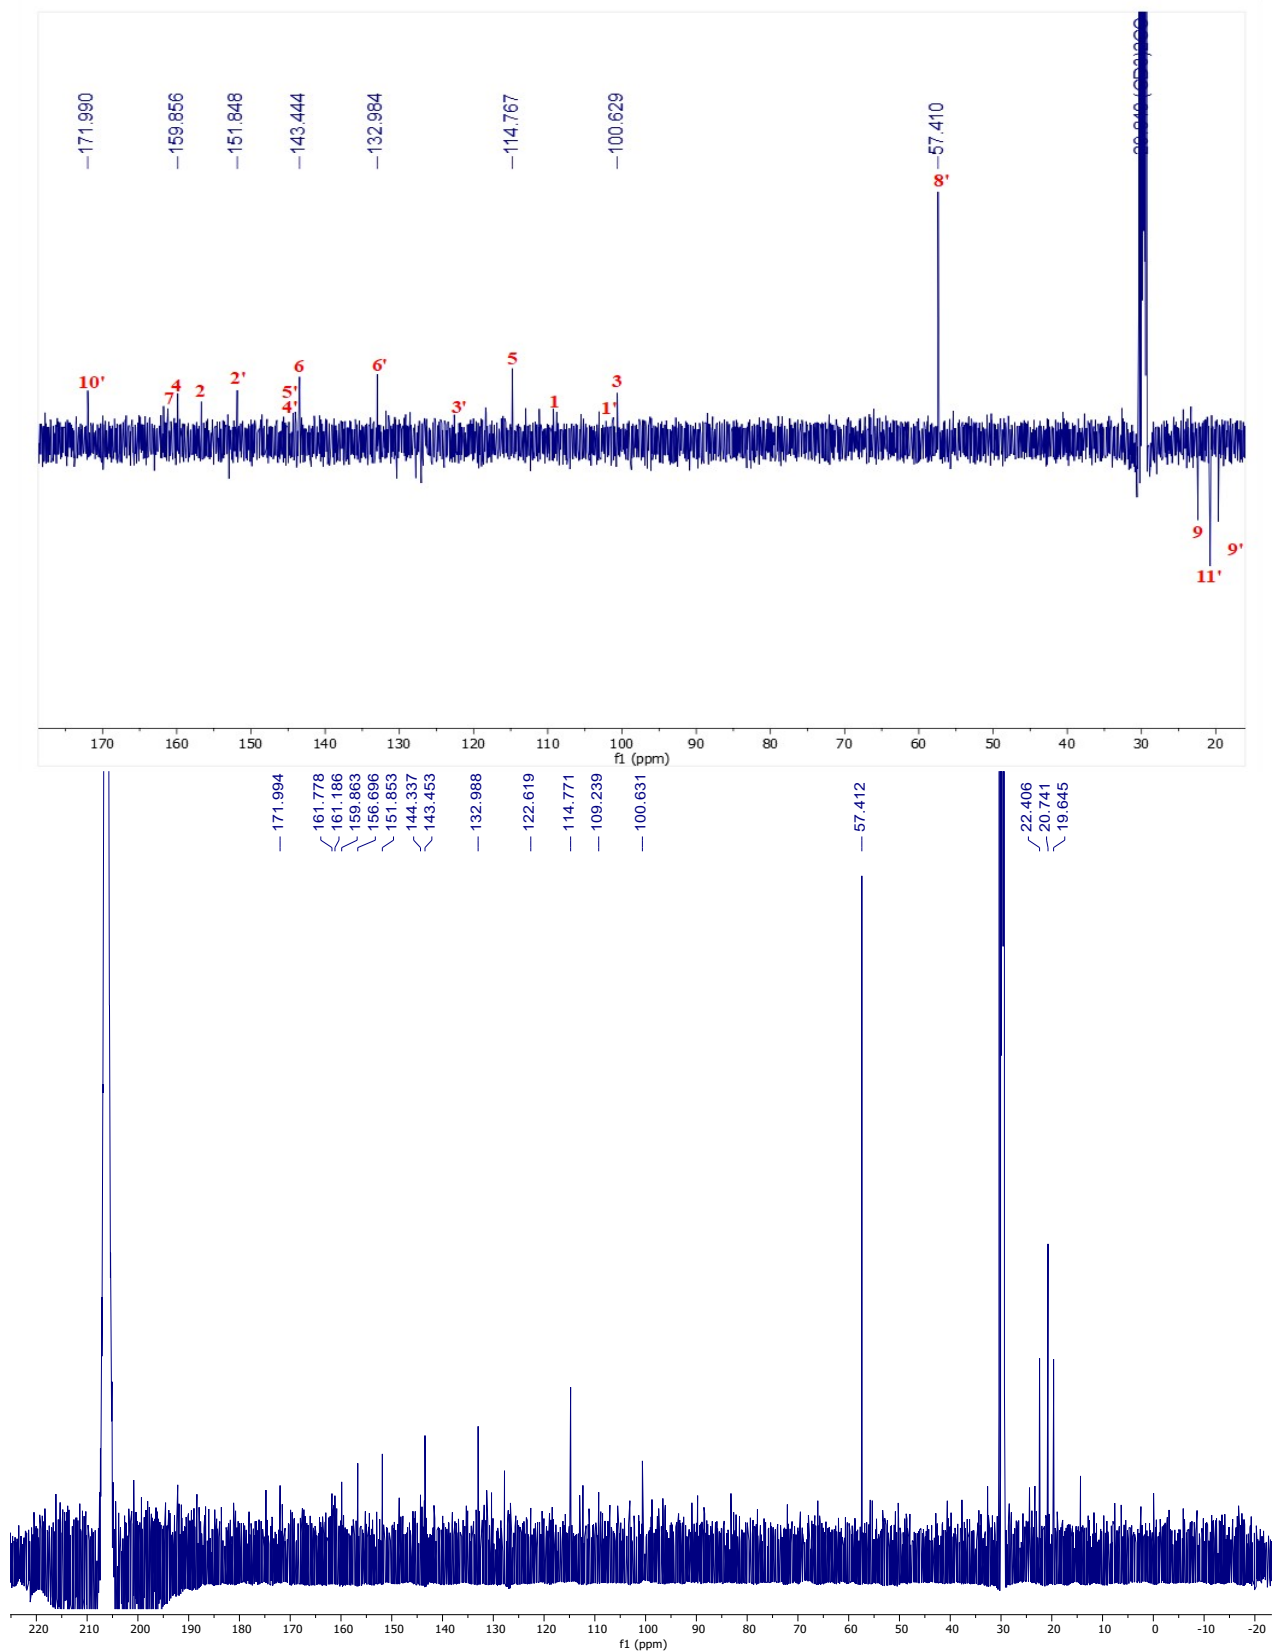

Figure S5-C. JMOD and  $^{13}\text{C}$  spectra (acetone- $d_6$ , 125 MHz) of **1d**

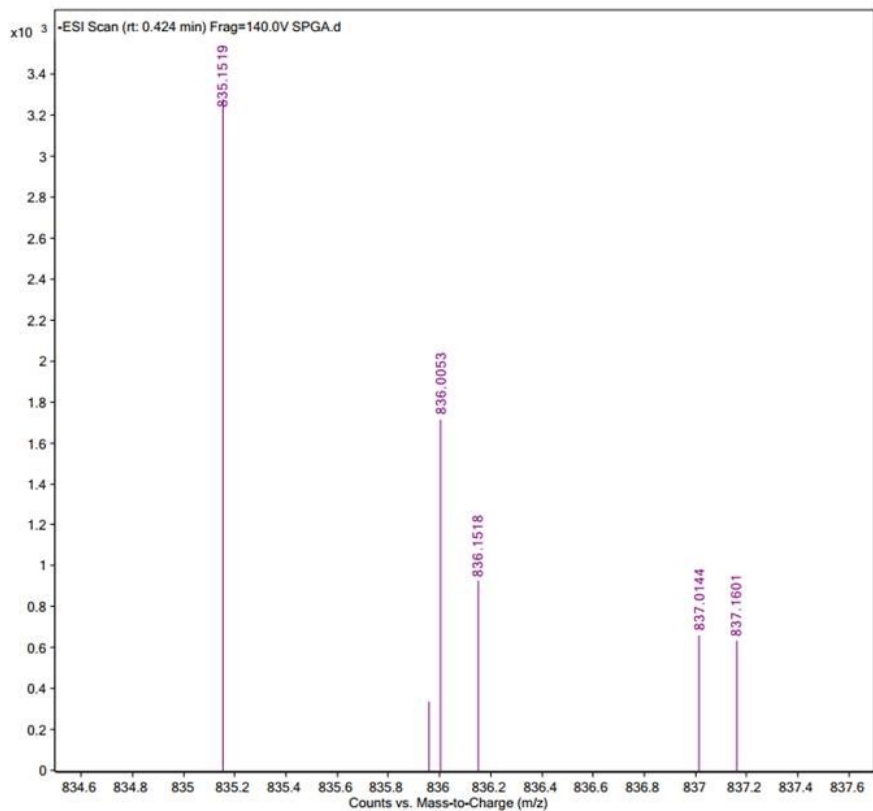

Figure S6-A. HRESIMS spectrum of **1e**

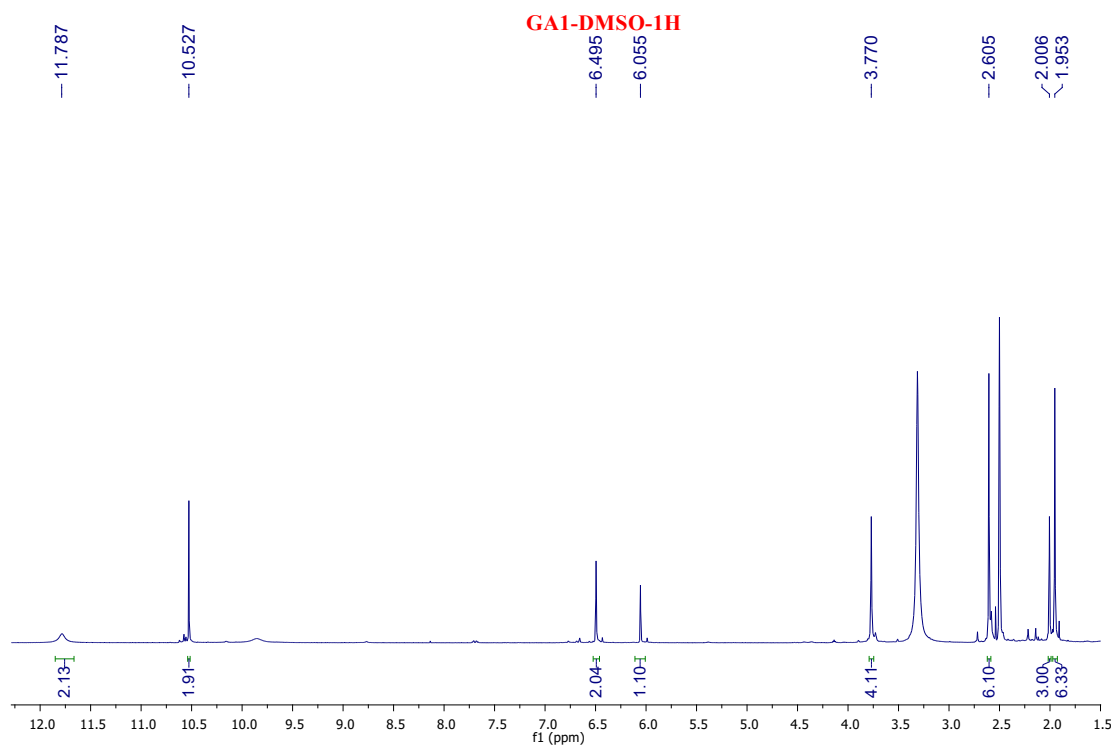

Figure S6-B. <sup>1</sup>H NMR (DMSO-*d*<sub>6</sub>, 500 MHz) spectrum of **1e**

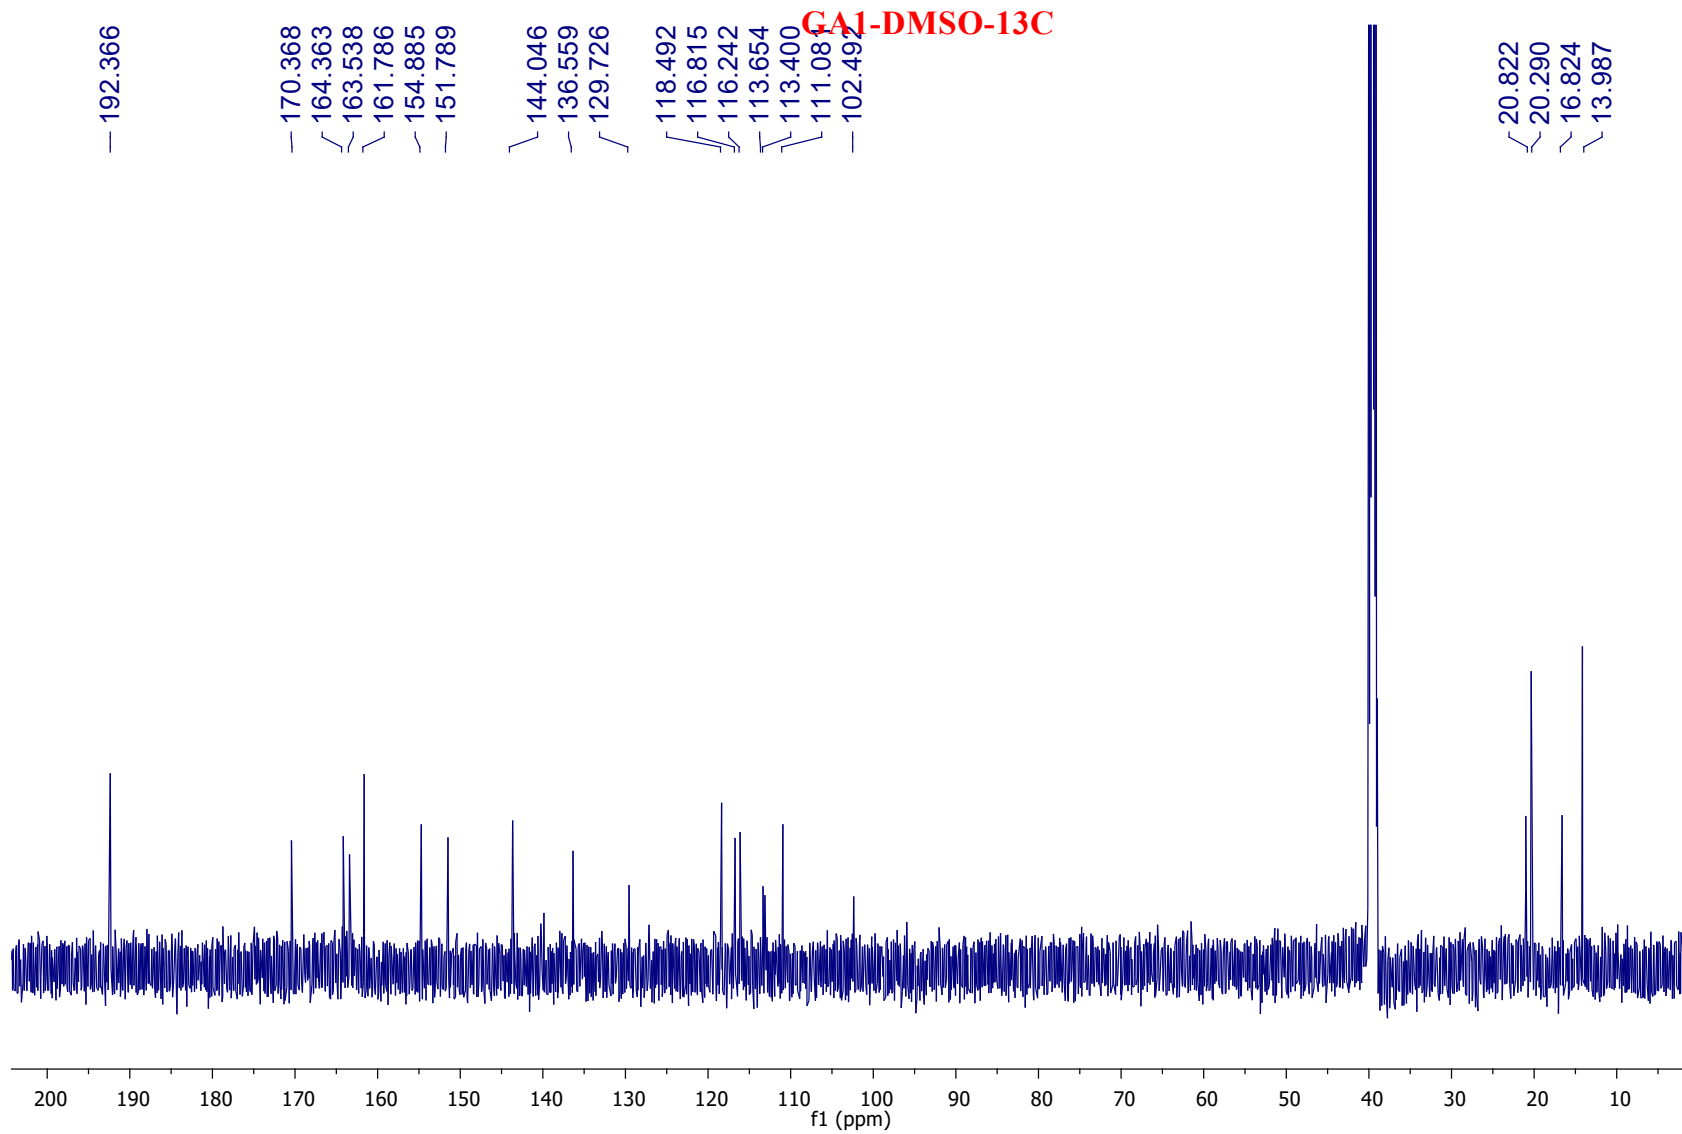

**Figure S6-C.**  $^{13}\text{C}$  NMR ( $\text{DMSO-}d_6$ , 125 MHz) spectrum of **1e**

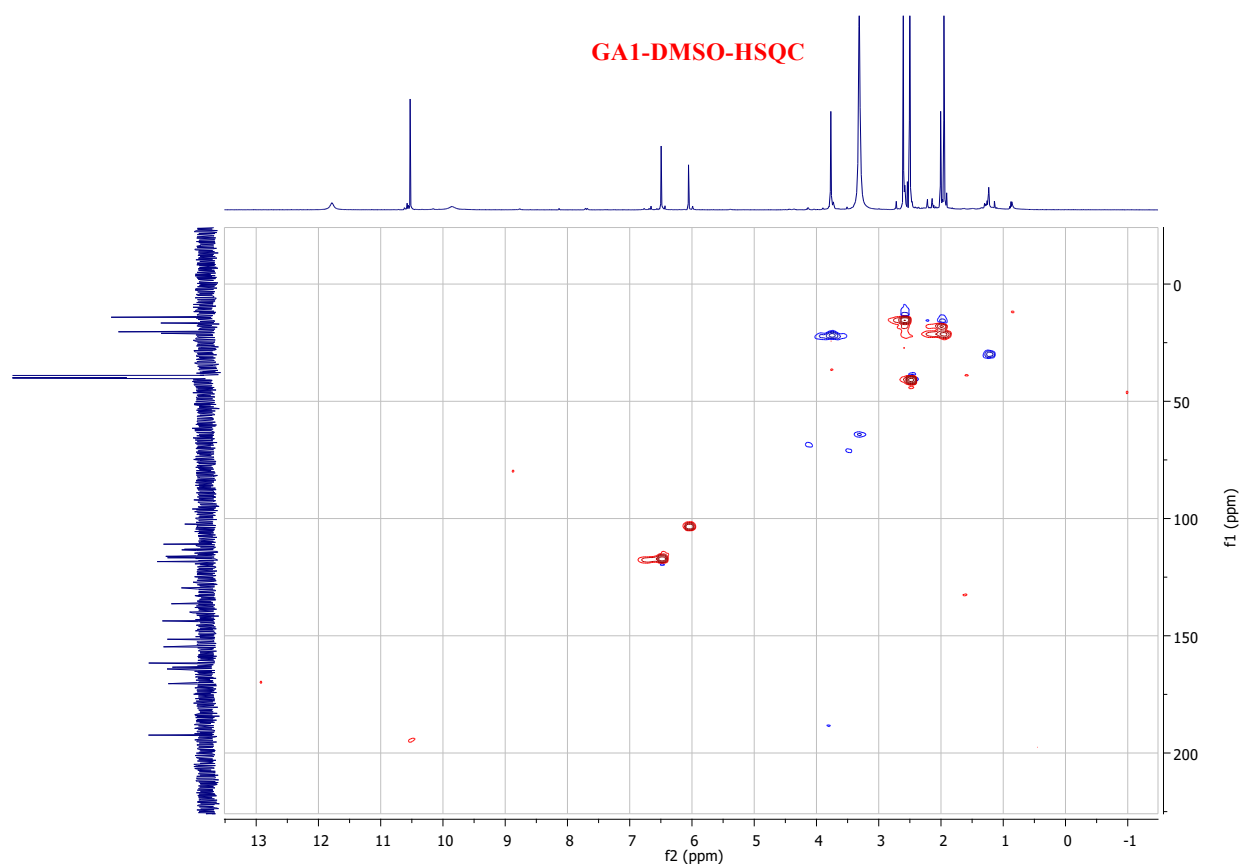

**Figure S6-D.** HSQC (DMSO- $d_6$ ) spectrum of **1e**



GA1-DMSO-HMBC

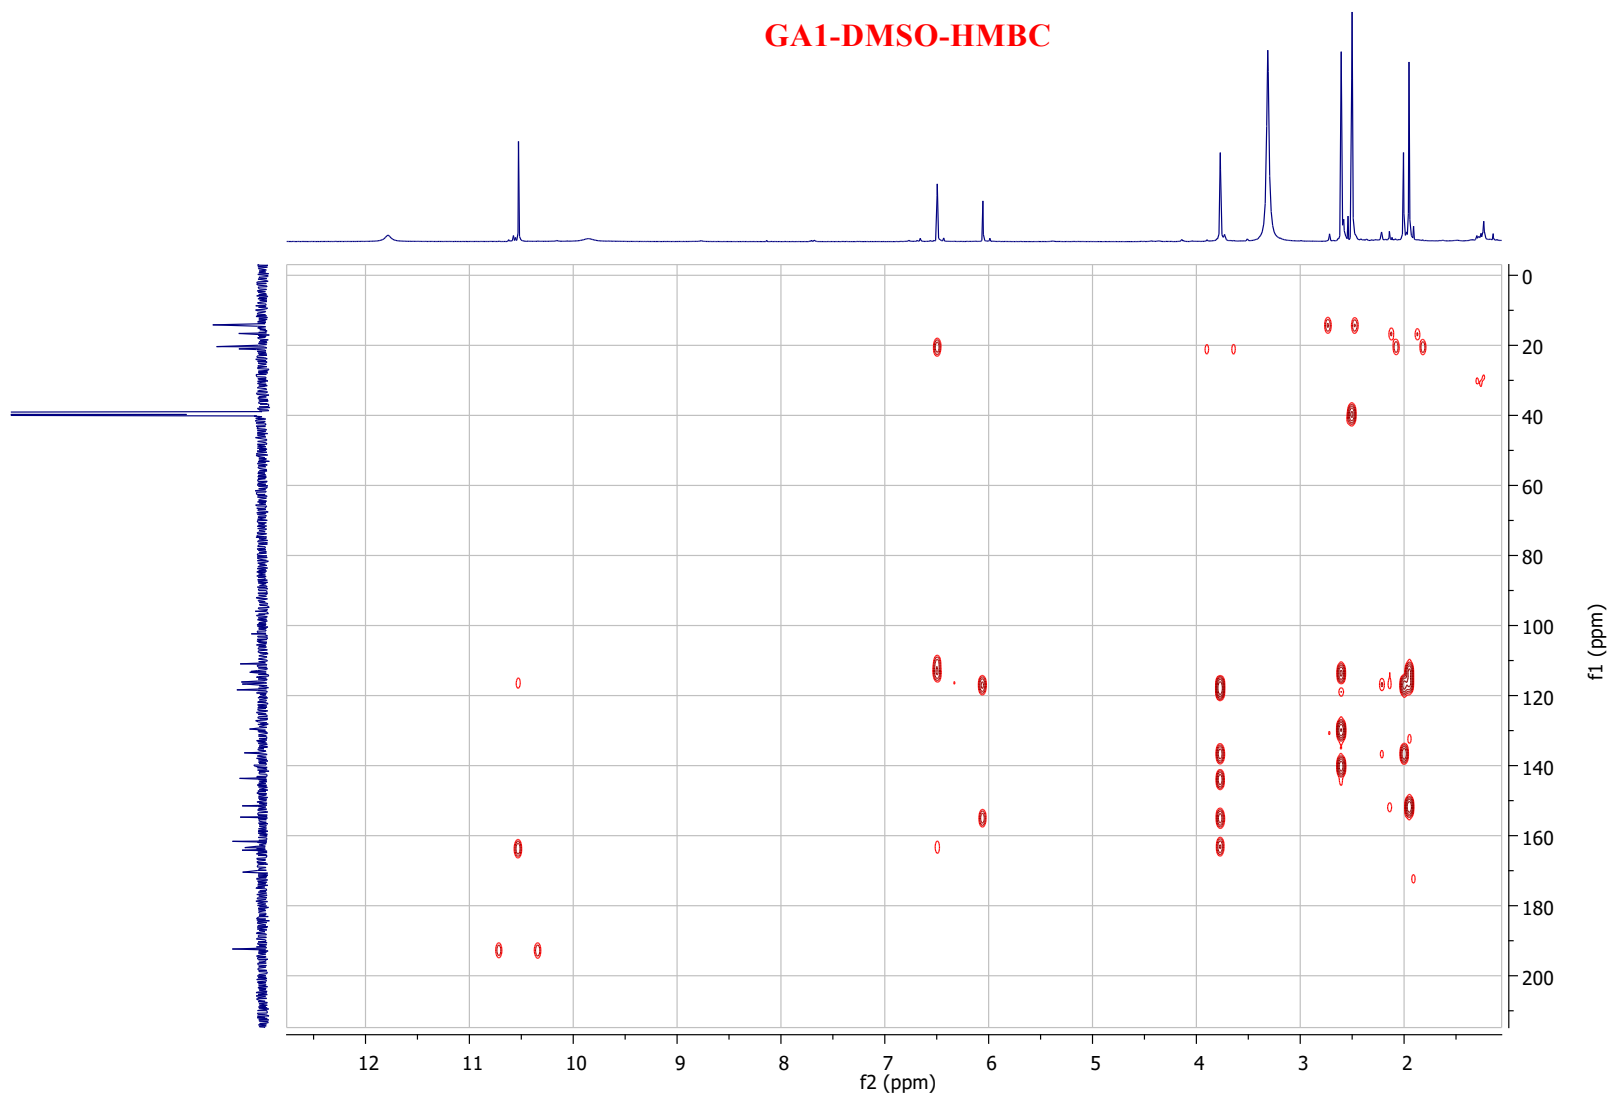

Figure S6-E. HMBC (DMSO-*d*<sub>6</sub>) spectrum of **1e**

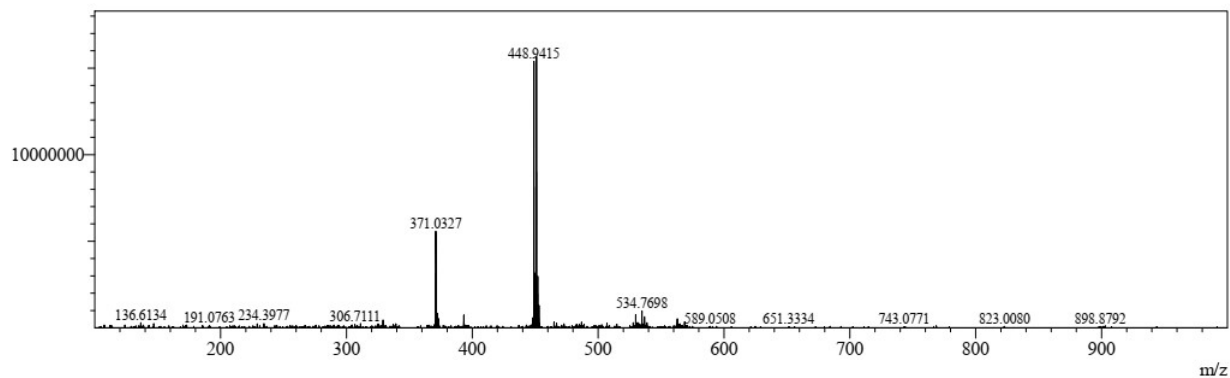

Figure S7-A. HRESIMS spectrum of **6a**

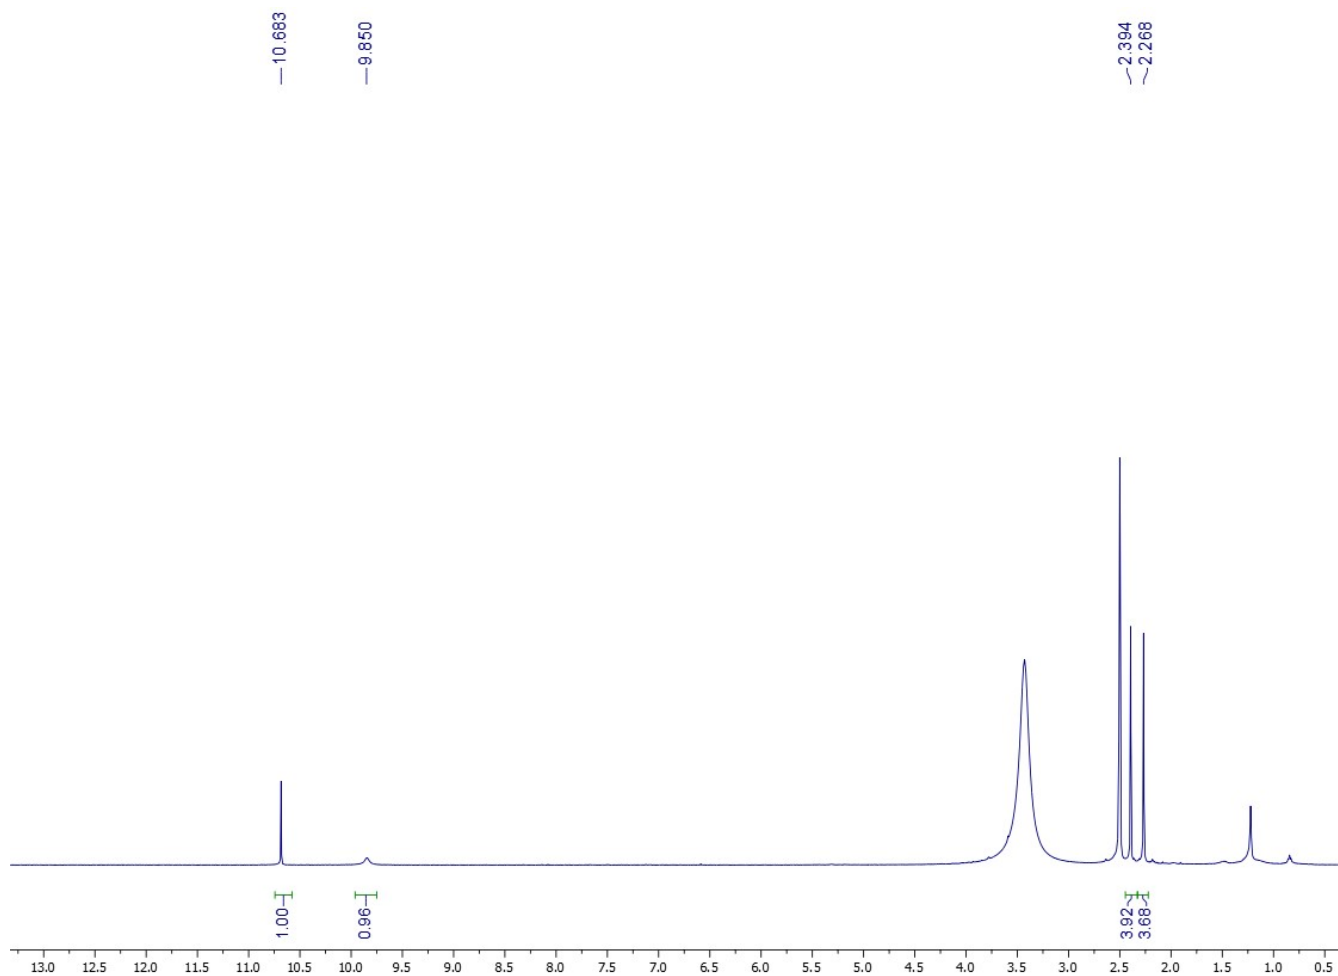

Figure S7-B.  $^1\text{H}$  NMR ( $\text{DMSO-}d_6$ , 500 MHz) spectrum of **6a**

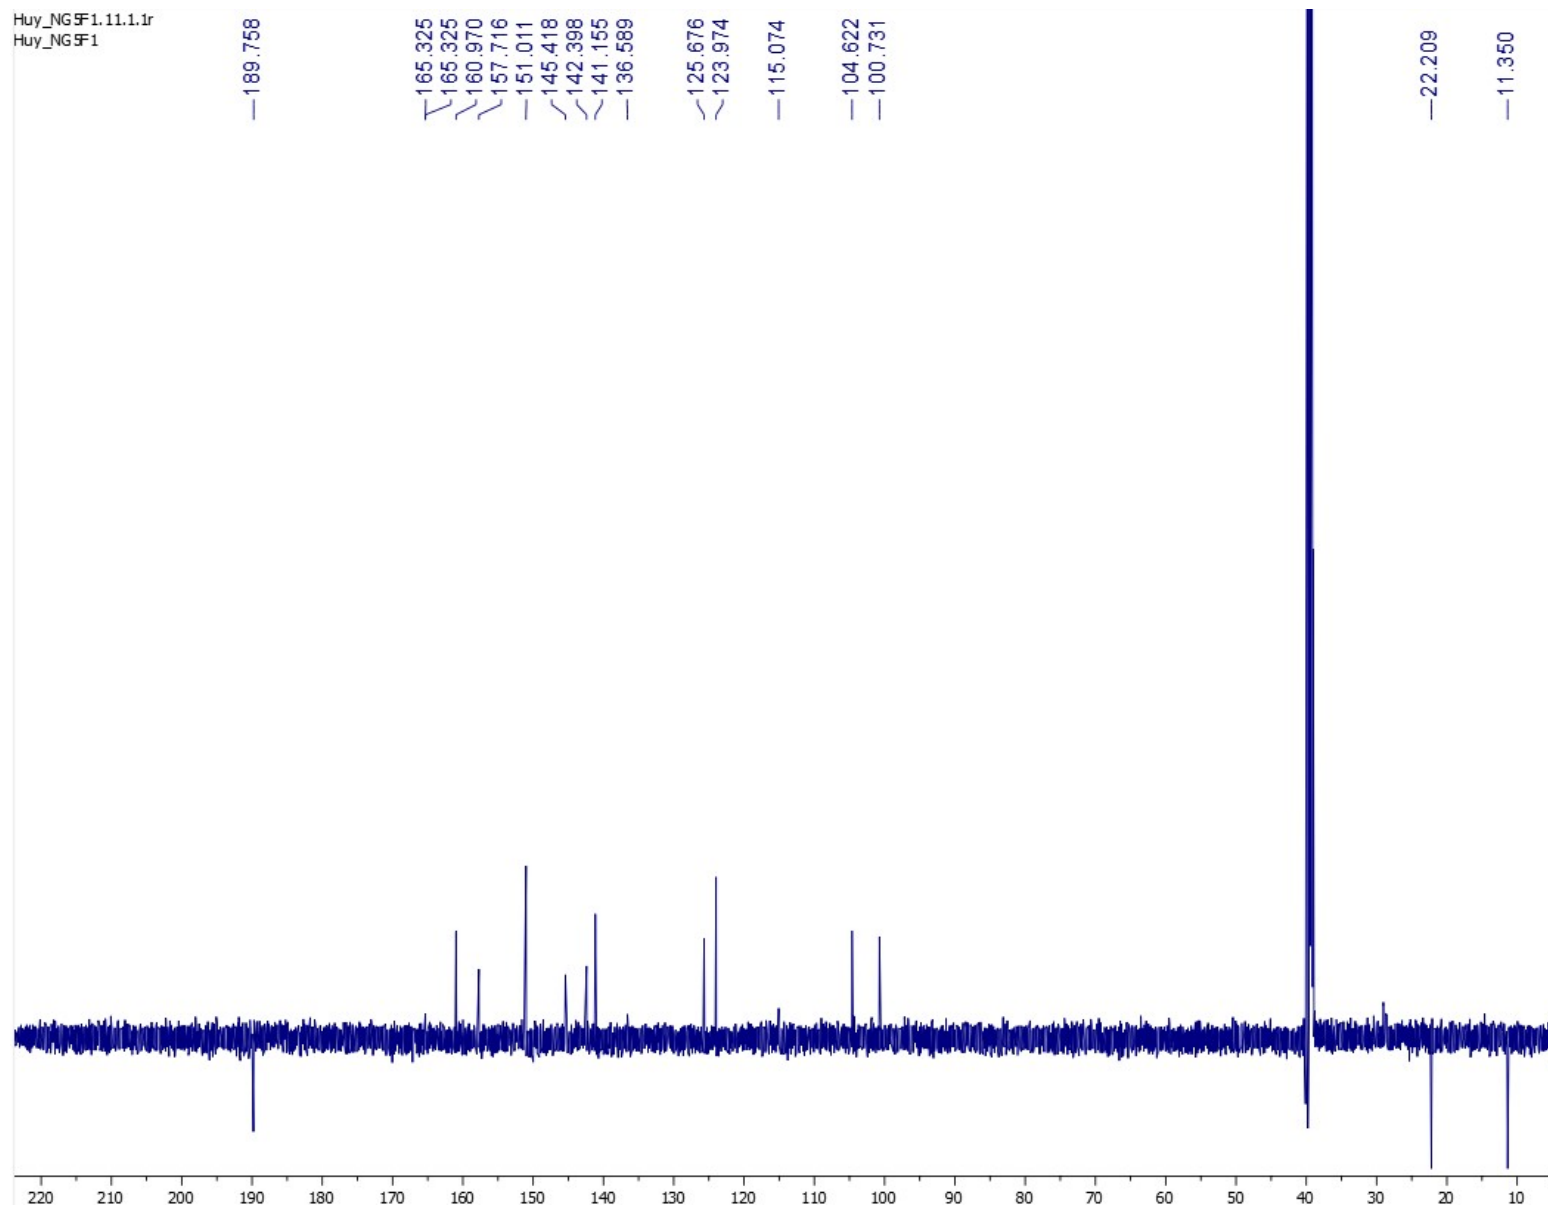

Figure S7-C. JMOD (DMSO- $d_6$ , 125 MHz) spectrum of **6a**

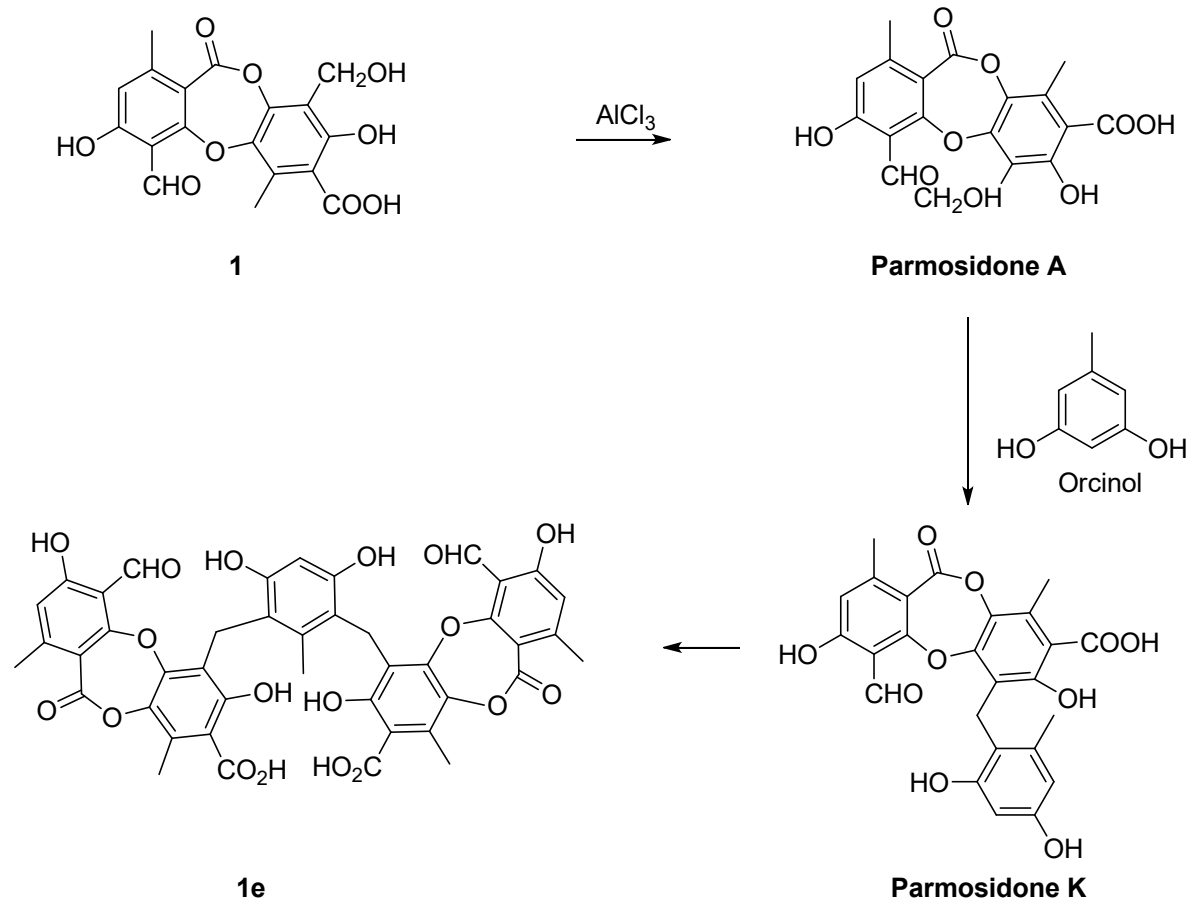

**Figure S8.** Transformation 1 to 1e

**Table S1.** Alpha-glucosidase inhibitory activity of the crude extracts and the fractions prepared from crude EtOAc extract.

| <b>Sample</b>                  | <b>IC<sub>50</sub> (μg/mL)</b> |
|--------------------------------|--------------------------------|
| Crude <i>n</i> -hexane extract | >200                           |
| Crude EtOAc extract            | 34.5 ± 1.2                     |
| Crude MeOH extract             | 96.1 ± 5.8                     |
| Fr. DY1                        | >200                           |
| Fr. DY2                        | >200                           |
| Fr. DY3                        | 45.6 ± 4.6                     |
| Fr. DY4                        | 33.3 ± 1.2                     |
| Fr. DY5                        | 15.1 ± 1.3                     |
| Fr. DY6                        | 24.3 ± 0.7                     |
| Fr. DY7                        | >200                           |
| Fr. DY8                        | >200                           |
| Fr. DY9                        | >200                           |
| Fr. DY10                       | >200                           |

**Table S2.** Cytotoxicity of compounds **1-6, 11, 1a-1e,** and **6a**

| Ligand      | Hek293<br>IC <sub>50</sub> (µg/mL) | HepG2<br>IC <sub>50</sub> (µg/mL) |
|-------------|------------------------------------|-----------------------------------|
| <b>1</b>    | 35.73 ± 2.4                        | 63.6 ± 0.06                       |
| <b>1a</b>   | >100                               | >100                              |
| <b>1b</b>   | >100                               | >100                              |
| <b>1c</b>   | 58.89 ± 2.84                       | 76.51 ± 1.07                      |
| <b>1d</b>   | 61.13 ± 2.71                       | 86.7 ± 0.68                       |
| <b>1e</b>   | >100                               | >100                              |
| <b>2</b>    | >100                               | >100                              |
| <b>3</b>    | 33.9 ± 1.6                         | >100                              |
| <b>4</b>    | >100                               | >100                              |
| <b>5</b>    | >100                               | >100                              |
| <b>6</b>    | >100                               | >100                              |
| <b>6a</b>   | 88.15 ± 2.02                       | >100                              |
| <b>11</b>   | 37.62 ± 4.3                        | 38.8 ± 0.5                        |
| Doxorubicin | 2.13 ± 0.01                        | 1.89 ± 0.03                       |

### Cytotoxicity Assay

The method used followed that reported by Nguyen et al. (2022). Briefly, HepG2 and Hek293 cells in a complete medium containing DMEM (HyClone, Cytiva, USA) and 10% fetal bovine serum (FBS) were seeded into a 96-well plate at  $5 \times 10^4$  cells per well. The cells were then incubated at 37°C with 5% CO<sub>2</sub>. After culturing for 24 h, the old medium was replaced by diluted compounds (in DMSO), positive control Doxorubicin (DOX, Fesenius Kabi, Germany), and negative control dimethyl sulfoxide (DMSO, Sigma-Aldrich, Germany). After 72 h of treatment, MTT (3-(4,5-Dimethyl-2-thiazolyl)-2,5-diphenyl-2H-tetrazolium bromide) was added into each well of the test plate. The plate was incubated at 37°C with 5% CO<sub>2</sub> for another 3 h. DMSO was used to dissolve the crystals from the interaction between MTT and viable cells. The absorbance of samples was read at 570 nm by the ELISA Reader (BioTek, USA). Cell death (% inhibition) was estimated by the following formula:

$$\% \text{ Inhibition} = 100 - [100 \times (A_{\text{Sample}} - A_{\text{B1}}) / (A_{\text{DMSO}} - A_{\text{B2}})]$$

Where, A<sub>Sample</sub>: Absorbance of sample, A<sub>DMSO</sub>: Absorbance of negative control, A<sub>B1</sub>: Absorbance of blank of sample, A<sub>B2</sub>: Absorbance of blank of DMSO. The IC<sub>50</sub> value and the inhibitory chart were respectively calculated and built using GraphPad Prism software (version 8.0.1, Insightful Science LLC, USA).

**Ref:** Nguyen HH, Aree T, Nguyen HT, et al. Diorygmones A-B, two new guaiane-sesquiterpenes from the cultured lichen mycobiont of *Diorygma* sp. *Natural Product Research*. Published online February 1, 2023:1-6. doi:10.1080/14786419.2023.2172007
